# Supplementary material for: Functional OCT4-specific CD4+ and CD8+ T cells in healthy controls and ovarian cancer patients
Source: PubMed Central journal article supplement — Oncoimmunology. 2013 Apr 1;2(5):e24271. doi: 10.4161/onci.24271 (PMC3667911; doi:10.4161/onci.24271), 2013-04-01
Supplement: onci-2-e24271-s01.pdf [file onci-2-e24271-s01.pdf]

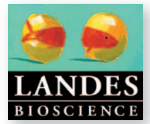

## **Supplemental Material to:**

**Jiabo Di, Leon F.A.G. Massuger, Tjitske Duiveman-de Boer,  
Petra L.M. Zusterzeel, Carl G. Figdor and Ruurd Torensma**

**Functional Oct4-specific CD4+ and CD8+ T cells in healthy  
controls and ovarian cancer patients**

**Oncoimmunology 2013; 2(5)**

**<http://dx.doi.org/10.4161/onci.24271>**

**[http://www.landesbioscience.com/journals/oncoimmunology/  
article/24271/](http://www.landesbioscience.com/journals/oncoimmunology/article/24271/)**

**Supplementary Table 1**  
**CD4+ T cell stimulation by Oct4 peptide loaded DC**

| Donor No. | IFN- $\gamma$ | Proliferation |
|-----------|---------------|---------------|
| 1         | -(avg)        | 2/6           |
| 2         | +(avg)        | 5/6           |
| 3         | +(avg)        | 6/6           |
| 4         | 0/6           | 2/6           |
| 5         | 1/6           | 5/6           |
| 6         | 4/6           | 0/6           |
| 7         | 0/6           | 0/6           |
| 8         | 0/6           | 1/6           |
| 9         | 0/6           | 0/6           |
| 10        | 2/6           | 0/6           |
| 11        | 1/6           | 1/6           |
| 12        | 0/6           | 0/6           |

Avg: average of 6 wells  
e.g. 1/6 means one well was positive out of 6 wells

| <b>Supplementary Table 2</b><br><b>CD8+ T cell stimulation by Oct4 peptide loaded DC</b> |               |               |
|------------------------------------------------------------------------------------------|---------------|---------------|
| Donor No.                                                                                | IFN- $\gamma$ | Proliferation |
| 1                                                                                        | -(avg)        | 0/6           |
| 2                                                                                        | -(avg)        | 0/6           |
| 3                                                                                        | -(avg)        | 0/6           |
| 4                                                                                        | 1/6           | 0/6           |
| 5                                                                                        | 0/6           | 0/6           |
| 6                                                                                        | 0/6           | 0/6           |
| 7                                                                                        | 0/6           | 0/6           |
| 8                                                                                        | 0/6           | 5/6           |
| 9                                                                                        | 0/6           | 1/6           |
| 10                                                                                       | 0/6           | 1/6           |
| 11                                                                                       | 0/6           | 0/6           |
| 12                                                                                       | 2/6           | 0/6           |
| Avg: average of 6 wells<br>e.g. 1/6 means one well was positive out of 6 wells           |               |               |

| <b>Supplementary Table 3</b><br><b>Summary of patient information</b> |     |            |                      |
|-----------------------------------------------------------------------|-----|------------|----------------------|
| Patient No.                                                           | Age | FIGO stage | Histological subtype |
| 90                                                                    | 61  | IIIc       | Serous               |
| 98                                                                    | 76  | IIIc       | Serous               |
| 124                                                                   | 67  | IIIc       | Serous               |
| 130                                                                   | 60  | IIIc       | Serous               |
| 140                                                                   | 59  | IV         | Not defined          |
